# Supplementary material for: TRPM7 kinase mediates hypomagnesemia-induced seizure-related death
Source: PubMed Central journal article supplement (PMC10185534; doi:10.1038/s41598-023-34789-2), 2023-05-15

Full, uncropped gel and blot images with ladder markers:

Figure 1(d)

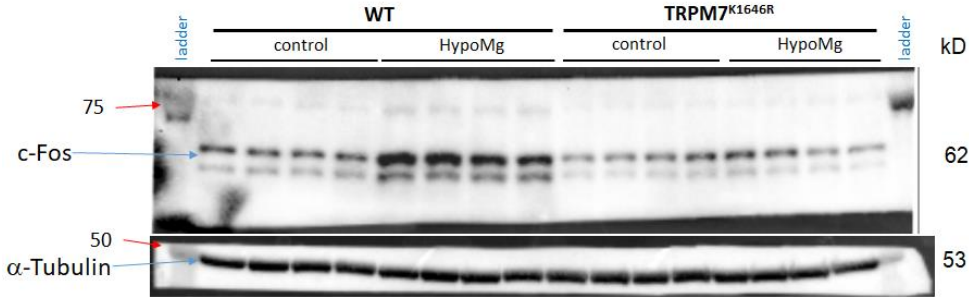

Figure 2

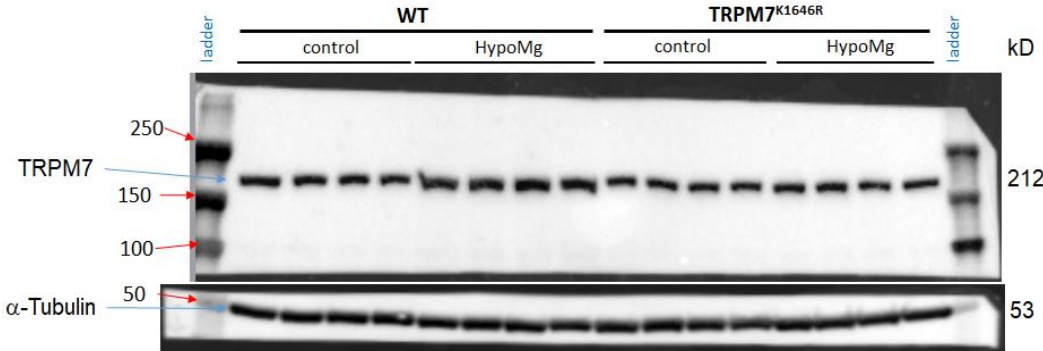

Figure 3(a)

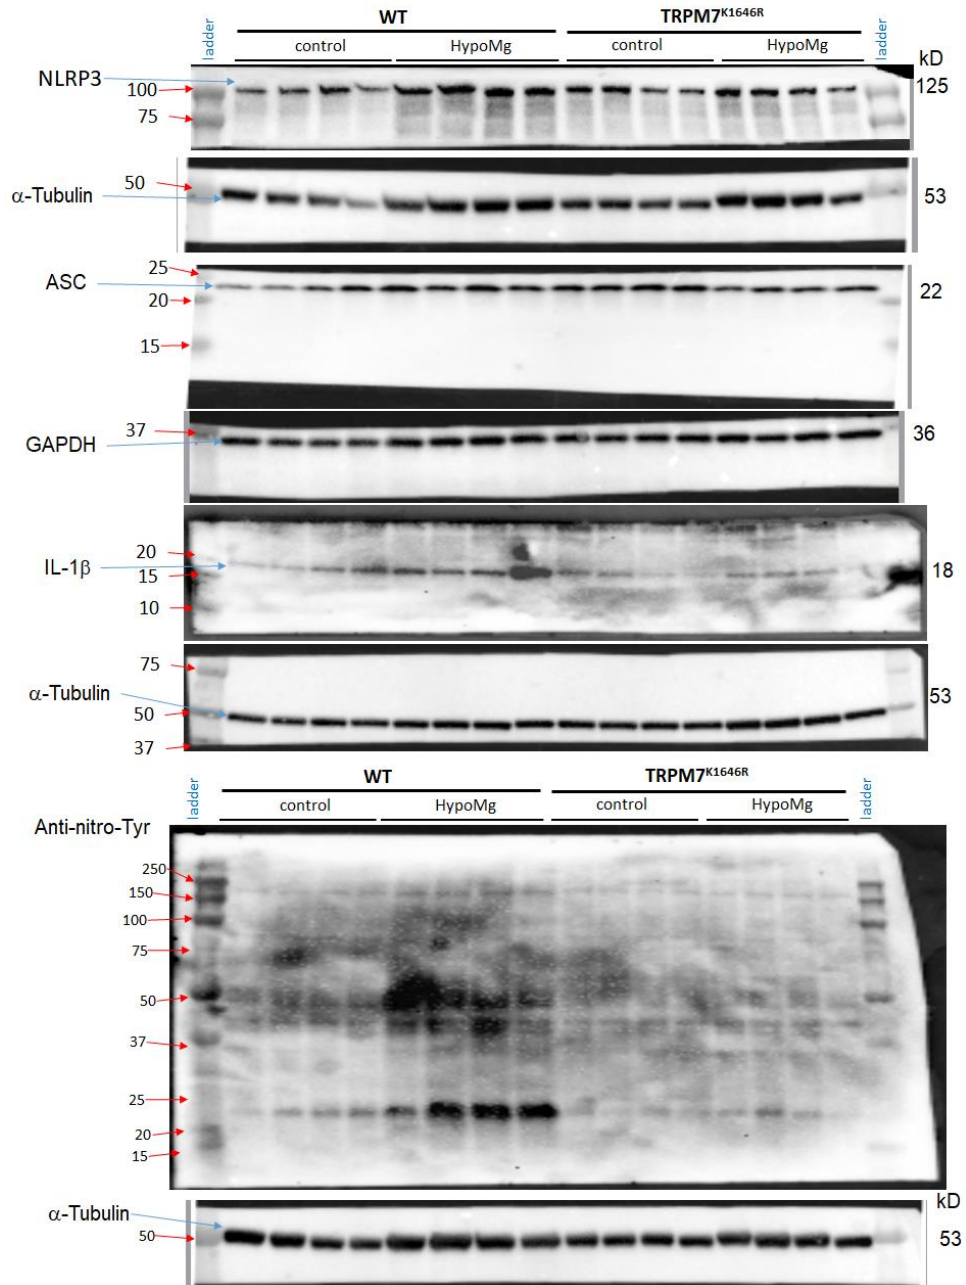

Figure 4(a)

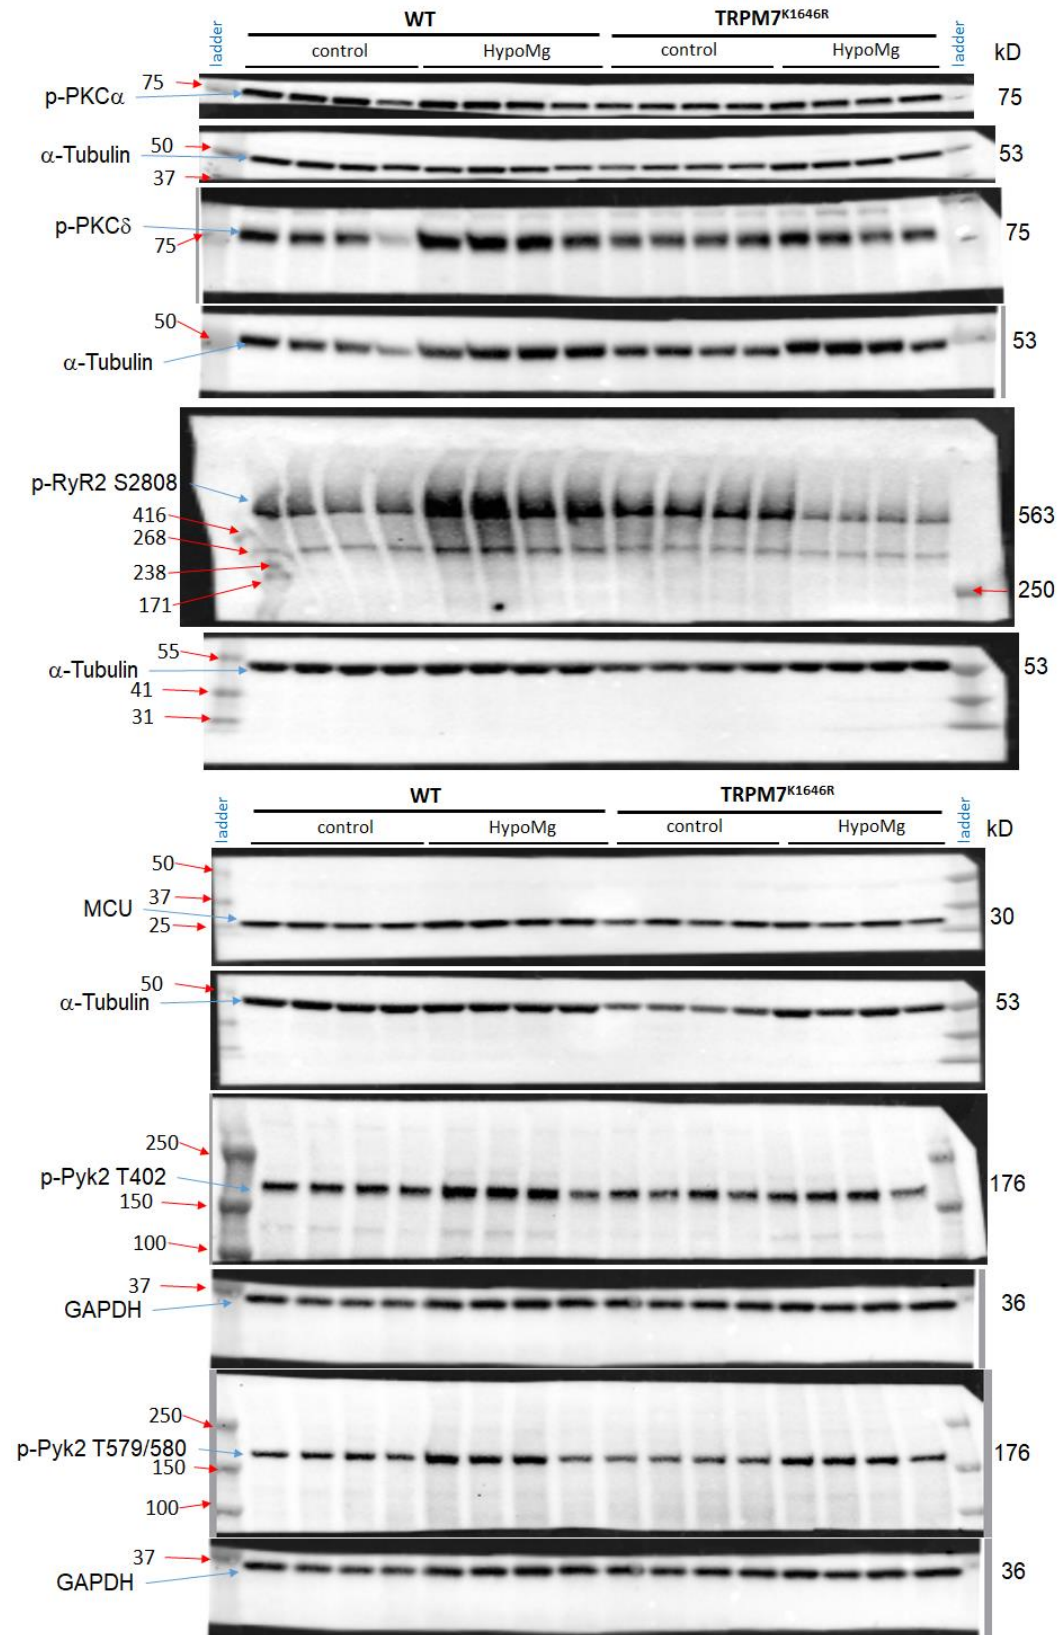

Figure 5 a and b

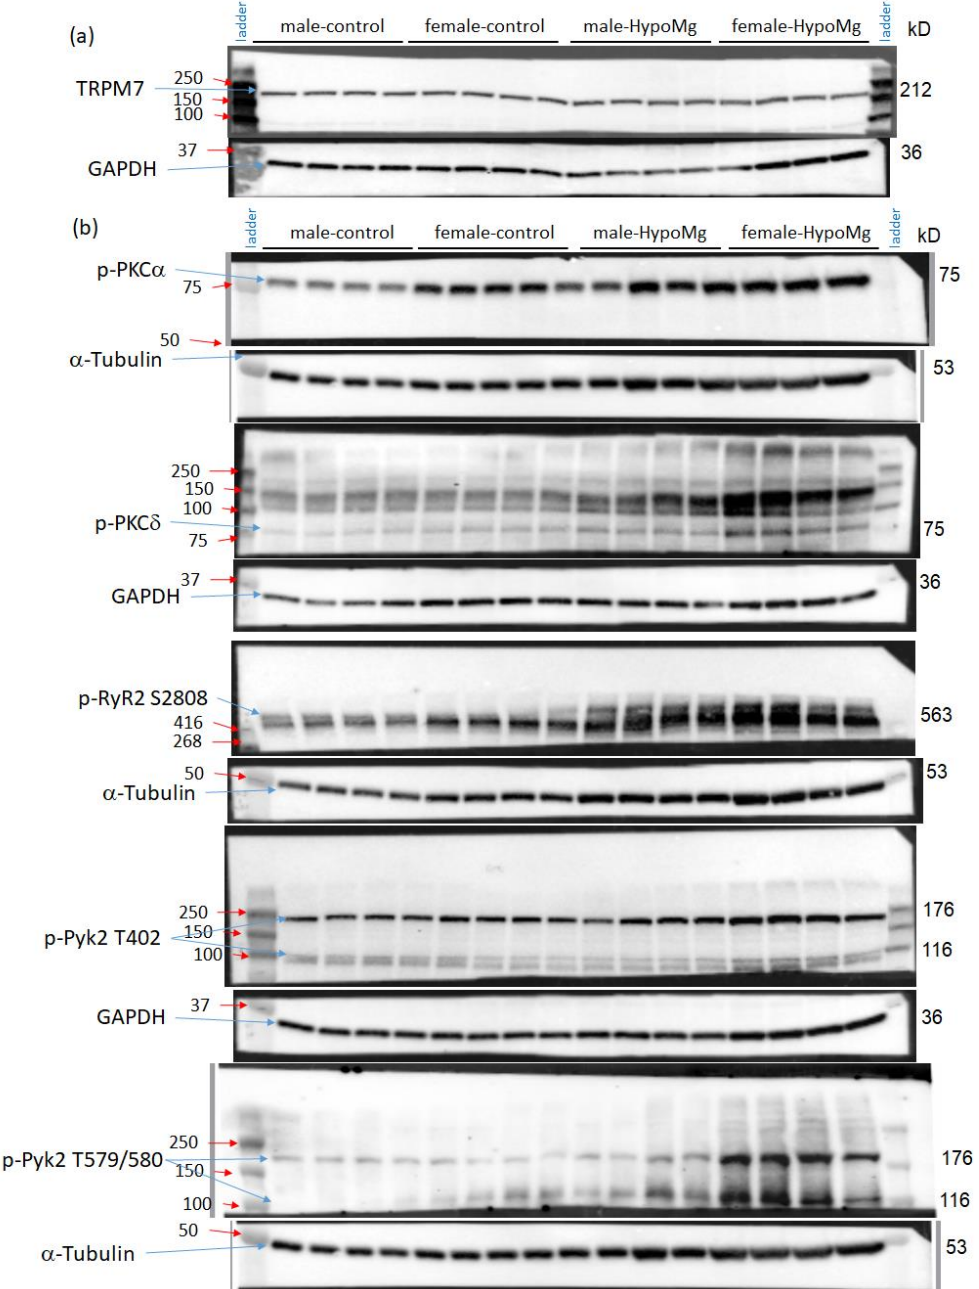

Fig 5 h and i

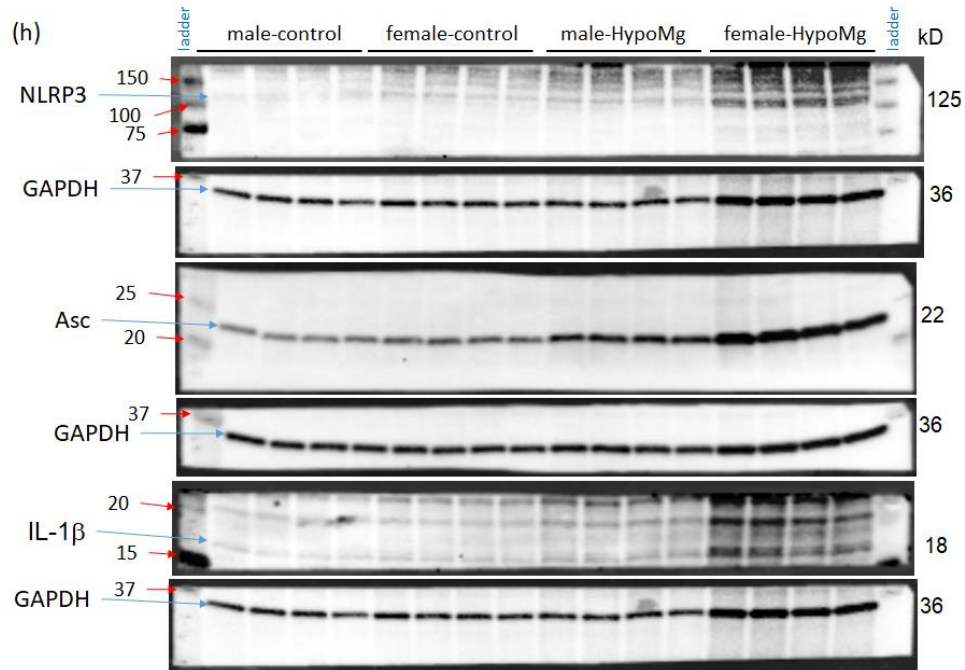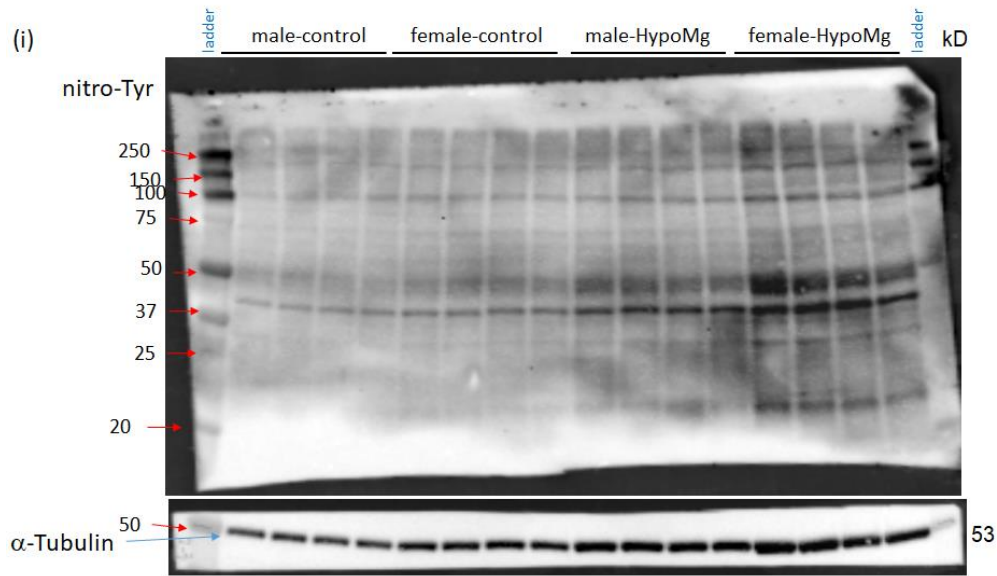

Supplement: 41598_2023_34789_MOESM2_ESM.pdf [file 41598_2023_34789_MOESM2_ESM.pdf]
